# Supplementary material for: Development and Characterization of a Functional Ice Cream from Sheep Milk Enriched with Microparticulated Whey Proteins, Inulin, Omega-3 Fatty Acids, and Bifidobacterium BB-12®
Source: MDPI journal article supplement (doi:10.3390/dairy5010011), 2024-02-01
Supplement: s1 [file s1]

**Table S1.** Physico-chemical and nutritional parameters of sheep's milk ice cream during frozen storage ( $-20 \pm 2$  °C) for up to 120 days (mean  $\pm$  SD).

| Parameters                                         | Storage time (days) |                   |                   |                   |                   |
|----------------------------------------------------|---------------------|-------------------|-------------------|-------------------|-------------------|
|                                                    | 1                   | 30                | 60                | 90                | 120               |
| pH (UpH)                                           | 4.9 $\pm$ 0.1       | 4.9 $\pm$ 0.1     | 4.9 $\pm$ 0.1     | 4.9 $\pm$ 0.1     | 4.9 $\pm$ 0.1     |
| Dry matter (DM) (%)                                | 38.3 $\pm$ 0.1      | 38.3 $\pm$ 0.1    | 38.4 $\pm$ 0.2    | 38.19 $\pm$ 0.01  | 38.3 $\pm$ 0.1    |
| MSNF <sup>1</sup> (%)                              | 8.4 $\pm$ 0.1       | 8.29 $\pm$ 0.03   | 8.4 $\pm$ 0.2     | 8.27 $\pm$ 0.03   | 8.3 $\pm$ 0.1     |
| Fat (%)                                            | 8.20 $\pm$ 0.01     | 8.22 $\pm$ 0.03   | 8.26 $\pm$ 0.02   | 8.19 $\pm$ 0.02   | 8.24 $\pm$ 0.02   |
| Omega-3 (EPA <sup>2</sup> + DHA <sup>3</sup> ) (%) | 0.216 $\pm$ 0.001   | 0.215 $\pm$ 0.001 | 0.214 $\pm$ 0.001 | 0.212 $\pm$ 0.001 | 0.211 $\pm$ 0.001 |
| Protein (%)                                        | 5.5 $\pm$ 0.1       | 5.6 $\pm$ 0.1     | 5.7 $\pm$ 0.2     | 5.6 $\pm$ 0.2     | 5.7 $\pm$ 0.1     |
| Casein (%)                                         | 2.8 $\pm$ 0.1       | 2.9 $\pm$ 0.1     | 2.9 $\pm$ 0.1     | 2.9 $\pm$ 0.1     | 2.9 $\pm$ 0.1     |
| Whey protein (%)                                   | 2.7 $\pm$ 0.1       | 2.7 $\pm$ 0.1     | 2.8 $\pm$ 0.1     | 2.8 $\pm$ 0.1     | 2.79 $\pm$ 0.03   |
| Lactose (%)                                        | 1.2 $\pm$ 0.2       | 1.2 $\pm$ 0.2     | 1.3 $\pm$ 0.2     | 1.2 $\pm$ 0.2     | 1.2 $\pm$ 0.2     |
| Inulin (%)                                         | 3.22 $\pm$ 0.04     | 3.2 $\pm$ 0.1     | 3.22 $\pm$ 0.03   | 3.2 $\pm$ 0.1     | 3.21 $\pm$ 0.04   |

<sup>1</sup>MSNF: milk solids-not-fat; <sup>2</sup> EPA: eicosapentaenoic acid; <sup>3</sup> DHA: docosahexaenoic acid.
